# Supplementary material for: First‐in‐Human, Healthy Volunteers Integrated Protocol of ETC‐206, an Oral Mnk 1/2 Kinase Inhibitor Oncology Drug
Source: PubMed Central journal article supplement — Clin Transl Sci. 2019 Sep 9;13(1):57–66. doi: 10.1111/cts.12678 (PMC6951458; doi:10.1111/cts.12678), 2019-09-09
Supplement: CTS-13-57-s001.pdf [file CTS-13-57-s001.pdf]

Table S1 Supplementary Material  
Main General Inclusion/Exclusion Criteria and Specific Exclusion Criteria.

|                                             |                                                                                                                                                                                                                                                                                                                                                                                                                                                                   |
|---------------------------------------------|-------------------------------------------------------------------------------------------------------------------------------------------------------------------------------------------------------------------------------------------------------------------------------------------------------------------------------------------------------------------------------------------------------------------------------------------------------------------|
| General                                     | <ul style="list-style-type: none"> <li>• Inclusion: Healthy adult male and female volunteers, aged 21 to 54 years (inclusive); No childbearing potential (either post and pre-menopausal) for female; adherence to predefined contraception criteria for male.</li> <li>• Exclusion: Unfit to be enrolled; participation in a study with a new or any other drug in the last four or three months respectively; donation of blood in the last 8 weeks.</li> </ul> |
| Specific (ECG intensive monitoring related) | <ul style="list-style-type: none"> <li>• Exclusion: ECG without sinus or ectopic supraventricular rhythm; QRS duration &gt; 109 ms; History of long QT syndrome or prolonged QTc &gt;450 ms; BP and HR higher than 140/90 mmHg and 100 bpm, respectively, or lower than 90/50 mmHg and 40 bpm, respectively; Ca, K, Mg and Na exceeding grade 1 of the CTCAE v4.03 classification or Ca, K and Mg below the lower limit of normal range.</li> </ul>               |

Legend – BP: Blood pressure; HR: Heart rate; CTCAE: Common Terminology Criteria for Adverse Events.
