# Supplementary material for: First‐in‐Human, Healthy Volunteers Integrated Protocol of ETC‐206, an Oral Mnk 1/2 Kinase Inhibitor Oncology Drug
Source: PubMed Central journal article supplement — Clin Transl Sci. 2019 Sep 9;13(1):57–66. doi: 10.1111/cts.12678 (PMC6951458; doi:10.1111/cts.12678), 2019-09-09
Supplement: CTS-13-57-s003.pdf [file CTS-13-57-s003.pdf]

Table S3 Supplementary Material  
Study Stopping Criteria<sup>Δ</sup>

| Threshold                                                          | Events                                                                                                                                                                                                                                                                                                                                                                                                                                                                                                                                                                                                                                                                                                                                                                |
|--------------------------------------------------------------------|-----------------------------------------------------------------------------------------------------------------------------------------------------------------------------------------------------------------------------------------------------------------------------------------------------------------------------------------------------------------------------------------------------------------------------------------------------------------------------------------------------------------------------------------------------------------------------------------------------------------------------------------------------------------------------------------------------------------------------------------------------------------------|
| General, target or vital organs related findings (in ≥ 2 subjects) | <ul style="list-style-type: none"> <li>• Clinically relevant signs or symptoms, which in the opinion of the investigator warrant stopping of dose administration.</li> <li>• Tachycardia defined as HR ≥ 115 bpm over at least 30 minutes in supine position (HR measured by 12-lead ECG).</li> <li>• Absolute QTcF increases to &gt;500 ms or QTcF increases &gt;60 ms compared to baseline (based on an average QTcF value of triplicate ECGs).</li> <li>• Evidence of clinically significant increases in liver functions tests (ALT ≥ or AST ≥ 2.5 x ULN and total bilirubin ≥ 1.5 x ULN).</li> <li>• A glomerular filtration rate (GFR) ≤90 mL/min/1.73m<sup>2</sup>, or serum creatinine &gt;2 mg/dL and &gt;0.5 mg/dL increase from baseline value.</li> </ul> |
| Gastrointestinal findings (in ≥ 4 subjects)                        | <ul style="list-style-type: none"> <li>• Moderate nausea or vomiting on 3 (or more) occasions on 2 successive days leaving the subject unable to eat a meal (CTCAE ≥2).</li> <li>• Moderate diarrhoea defined as increase to 4 (or more) episodes per day over baseline (CTCAE grade ≥ 2).</li> </ul>                                                                                                                                                                                                                                                                                                                                                                                                                                                                 |
| Occurrence (in ≥1 subjects)                                        | <ul style="list-style-type: none"> <li>• The highest dose intended for administration as defined in this protocol has been reached.<sup>‡</sup></li> <li>• ETC-206 total mean AUC<sub>0-inf</sub> of 7,230ng*h/mL or C<sub>max</sub> of 935 ng/mL has been achieved (according to NOAEL observed in dogs at the dose of 3 mg/kg/day in the 4- week study).<sup>‡</sup></li> <li>• Any other event that in the opinion of the sponsor and principal investigator warrant stopping of dose administration</li> </ul>                                                                                                                                                                                                                                                    |

Legend - CTCAE: Common Terminology Criteria for Adverse Events; NOAEL: No observed adverse effect level; <sup>Δ</sup>: Individual items work also as subject withdrawal criteria; <sup>‡</sup>: Removed with amendment after 10 mg SD administration in fasted condition.
