# Supplementary material for: First‐in‐Human, Healthy Volunteers Integrated Protocol of ETC‐206, an Oral Mnk 1/2 Kinase Inhibitor Oncology Drug
Source: PubMed Central journal article supplement — Clin Transl Sci. 2019 Sep 9;13(1):57–66. doi: 10.1111/cts.12678 (PMC6951458; doi:10.1111/cts.12678), 2019-09-09
Supplement: CTS-13-57-s004.pdf [file CTS-13-57-s004.pdf]

Table S4 Supplementary Material  
Methods for Pharmacokinetic Sampling

Blood samples (3mL) for ETC-206 pharmacokinetics were collected at pre-dose and at 0.25, 0.5, 1, 1.5, 2, 3, 4, 6, 8, 12, 24, 30, 36, 48, 72 ( $\pm$  6 minutes) and 144 hours ( $\pm$  30 minutes) after dosing. Samples were collected via phlebotomy in plastic K2EDTA tubes and centrifuged (1300 g) for 10 minutes at room temperature. The serum was separated and stored at  $-65^{\circ}\text{C}$  to  $-80^{\circ}\text{C}$  until analysis. ETC-206 concentration were quantified using HPLC with MS/MS detection.
