# Supplementary material for: First‐in‐Human, Healthy Volunteers Integrated Protocol of ETC‐206, an Oral Mnk 1/2 Kinase Inhibitor Oncology Drug
Source: PubMed Central journal article supplement — Clin Transl Sci. 2019 Sep 9;13(1):57–66. doi: 10.1111/cts.12678 (PMC6951458; doi:10.1111/cts.12678), 2019-09-09
Supplement: CTS-13-57-s005.pdf [file CTS-13-57-s005.pdf]

Table S5 Supplementary Material  
Methods for Pharmacodynamic Sampling

A) The levels of **relative p-eIF4E** were assessed in 1) blood (PBMCs), 2) HFs and 3) skin, at pre-dose and post-dose time points as described below.

|   |                                                                                                                                                                  |
|---|------------------------------------------------------------------------------------------------------------------------------------------------------------------|
| 1 | Blood samples (8 mL) for PBMCs evaluations had the following time points: pre-dose and at 1, 2, 4, 6, 12, 24 and 30 hours ( $\pm 6$ minutes) after dosing        |
| 2 | Hair follicles ( $\geq 40$ /time point) collection had the following time points: pre-dose and at 1, 2, 3, 6, 12, and 24 hours ( $\pm 15$ minutes) after dosing. |
| 3 | Skin punch biopsy (2-4 mm diameter) had the following time points: pre-dose and at 1.5 hour after dosing ( $\pm 30$ minutes), only during the fed dosing period. |

eIF4E and p-eIF4E were detected by means of rabbit antibodies (Cell Signaling Technology, Danvers, Massachusetts) and the levels of relative p-eIF4E were quantified using Western blot analysis, followed by densitometry. Biological samples were collected and processed according to the study manual instructions.

B) The levels of **circulating cytokines, chemokines and growth factors** were assessed in blood (plasma) at pre-dose and post-dose time points as described below.

|                                                                                                                       |
|-----------------------------------------------------------------------------------------------------------------------|
| Blood samples (3 mL) had the following time points: pre-dose and at 24, 48 and 72 hours post dose ( $\pm 6$ minutes). |
|-----------------------------------------------------------------------------------------------------------------------|

The levels of circulating cytokines, chemokines and growth factors were quantified using 3 separate and validated assay panels (Meso Scale Discovery (MSD) multi-array assays): panel 1 for IL-1 $\beta$ , IL-2, IL-4, IL-6, IL-8, IFN $\gamma$ , TNF $\alpha$ ; panel 2 for IL-15, IL-17A; and panel 3 for MCP-1, and IP-10. Blood samples were collected and processed according to the study manual instructions.
