# Supplementary material for: First‐in‐Human, Healthy Volunteers Integrated Protocol of ETC‐206, an Oral Mnk 1/2 Kinase Inhibitor Oncology Drug
Source: PubMed Central journal article supplement — Clin Transl Sci. 2019 Sep 9;13(1):57–66. doi: 10.1111/cts.12678 (PMC6951458; doi:10.1111/cts.12678), 2019-09-09
Supplement: CTS-13-57-s007.pdf [file CTS-13-57-s007.pdf]

Table S7 Summary of Treatment-emergent Adverse Events

| System Organ Class<br>Preferred Term                            | ETC-1907206      |     |                        |     |                    |     |                        |     |
|-----------------------------------------------------------------|------------------|-----|------------------------|-----|--------------------|-----|------------------------|-----|
|                                                                 | Placebo<br>(N=8) |     | 10 mg Fasted<br>(N=16) |     | 10 mg Fed<br>(N=9) |     | 20 mg Fasted<br>(N=14) |     |
|                                                                 | n (%)            | nAE | n (%)                  | nAE | n (%)              | nAE | n (%)                  | nAE |
| <b>Subjects with at least one AE</b>                            | 5 ( 62.5)        |     | 9 ( 56.3)              |     | 9 ( 100)           |     | 11 ( 78.6)             |     |
| <b>Subjects with no AE</b>                                      | 3 ( 37.5)        |     | 7 ( 43.8)              |     | 0                  |     | 3 ( 21.4)              |     |
| <b>Gastrointestinal Disorders</b>                               | 0                | 0   | 4 ( 25.0)              | 7   | 2 ( 22.2)          | 3   | 3 ( 21.4)              | 5   |
| Abdominal Distension                                            | 0                | 0   | 1 ( 6.3)               | 1   | 0                  | 0   | 0                      | 0   |
| Diarrhoea                                                       | 0                | 0   | 3 ( 18.8)              | 4   | 2 ( 22.2)          | 3   | 3 ( 21.4)              | 5   |
| Toothache                                                       | 0                | 0   | 1 ( 6.3)               | 1   | 0                  | 0   | 0                      | 0   |
| Vomiting                                                        | 0                | 0   | 1 ( 6.3)               | 1   | 0                  | 0   | 0                      | 0   |
| <b>General Disorders And Administration Site<br/>Conditions</b> | 0                | 0   | 2 ( 12.5)              | 2   | 2 ( 22.2)          | 2   | 0                      | 0   |
| Pyrexia                                                         | 0                | 0   | 2 ( 12.5)              | 2   | 2 ( 22.2)          | 2   | 0                      | 0   |
| <b>Infections And Infestations</b>                              | 0                | 0   | 1 ( 6.3)               | 1   | 0                  | 0   | 0                      | 0   |
| Rhinitis                                                        | 0                | 0   | 1 ( 6.3)               | 1   | 0                  | 0   | 0                      | 0   |
| <b>Injury, Poisoning And Procedural<br/>Complications</b>       | 4 ( 50.0)        | 5   | 1 ( 6.3)               | 1   | 4 ( 44.4)          | 5   | 5 ( 35.7)              | 5   |
| Arthropod Bite                                                  | 0                | 0   | 0                      | 0   | 0                  | 0   | 1 ( 7.1)               | 1   |
| Phlebitis                                                       | 1 ( 12.5)        | 1   | 1 ( 6.3)               | 1   | 0                  | 0   | 0                      | 0   |
| Post Procedural Complication                                    | 0                | 0   | 0                      | 0   | 2 ( 22.2)          | 2   | 0                      | 0   |
| Post Procedural Discomfort                                      | 2 ( 25.0)        | 2   | 0                      | 0   | 0                  | 0   | 0                      | 0   |
| Procedural Pain                                                 | 2 ( 25.0)        | 2   | 0                      | 0   | 3 ( 33.3)          | 3   | 4 ( 28.6)              | 4   |

AE: Adverse event; n (%) = Number (percent) of subjects; nAE = Number of adverse events  
Number of subjects in an analysis group is denominator for calculation of percentages.  
AEs that occurred prior to a subject's first dose are not included.

Table S7 Summary of Treatment-emergent Adverse Events, continued

| System Organ Class<br>Preferred Term                   | ETC-1907206      |     |                        |     |                    |     |                        |     |
|--------------------------------------------------------|------------------|-----|------------------------|-----|--------------------|-----|------------------------|-----|
|                                                        | Placebo<br>(N=8) |     | 10 mg Fasted<br>(N=16) |     | 10 mg Fed<br>(N=9) |     | 20 mg Fasted<br>(N=14) |     |
|                                                        | n (%)            | nAE | n (%)                  | nAE | n (%)              | nAE | n (%)                  | nAE |
| <b>Investigations</b>                                  | 0                | 0   | 5 ( 31.3)              | 7   | 1 ( 11.1)          | 1   | 1 ( 7.1)               | 2   |
| Alanine Aminotransferase Increased                     | 0                | 0   | 1 ( 6.3)               | 1   | 0                  | 0   | 0                      | 0   |
| Blood Creatine Phosphokinase Increased                 | 0                | 0   | 1 ( 6.3)               | 2   | 0                  | 0   | 1 ( 7.1)               | 2   |
| White Blood Cell Count Decreased                       | 0                | 0   | 3 ( 18.8)              | 4   | 1 ( 11.1)          | 1   | 0                      | 0   |
| <b>Metabolism And Nutrition Disorders</b>              | 0                | 0   | 0                      | 0   | 2 ( 22.2)          | 2   | 0                      | 0   |
| Hyperkalaemia                                          | 0                | 0   | 0                      | 0   | 2 ( 22.2)          | 2   | 0                      | 0   |
| <b>Nervous System Disorders</b>                        | 0                | 0   | 1 ( 6.3)               | 1   | 1 ( 11.1)          | 1   | 2 ( 14.3)              | 3   |
| Headache                                               | 0                | 0   | 0                      | 0   | 1 ( 11.1)          | 1   | 1 ( 7.1)               | 2   |
| Lethargy                                               | 0                | 0   | 0                      | 0   | 0                  | 0   | 1 ( 7.1)               | 1   |
| Seizure                                                | 0                | 0   | 1 ( 6.3)               | 1   | 0                  | 0   | 0                      | 0   |
| <b>Respiratory, Thoracic And Mediastinal Disorders</b> | 1 ( 12.5)        | 1   | 1 ( 6.3)               | 1   | 0                  | 0   | 1 ( 7.1)               | 1   |
| Cough                                                  | 1 ( 12.5)        | 1   | 0                      | 0   | 0                  | 0   | 0                      | 0   |
| Oropharyngeal Pain                                     | 0                | 0   | 1 ( 6.3)               | 1   | 0                  | 0   | 0                      | 0   |
| Rhinorrhoea                                            | 0                | 0   | 0                      | 0   | 0                  | 0   | 1 ( 7.1)               | 1   |
| <b>Skin And Subcutaneous Tissue Disorders</b>          | 1 ( 12.5)        | 1   | 2 ( 12.5)              | 2   | 0                  | 0   | 1 ( 7.1)               | 1   |
| Rash                                                   | 0                | 0   | 2 ( 12.5)              | 2   | 0                  | 0   | 1 ( 7.1)               | 1   |
| Rash Maculo-Papular                                    | 1 ( 12.5)        | 1   | 0                      | 0   | 0                  | 0   | 0                      | 0   |

AE: Adverse event; n (%) = Number (percent) of subjects; nAE = Number of adverse events  
Number of subjects in an analysis group is denominator for calculation of percentages.  
AEs that occurred prior to a subject's first dose are not included.
