# Supplementary material for: First‐in‐Human, Healthy Volunteers Integrated Protocol of ETC‐206, an Oral Mnk 1/2 Kinase Inhibitor Oncology Drug
Source: PubMed Central journal article supplement — Clin Transl Sci. 2019 Sep 9;13(1):57–66. doi: 10.1111/cts.12678 (PMC6951458; doi:10.1111/cts.12678), 2019-09-09
Supplement: CTS-13-57-s008.pdf [file CTS-13-57-s008.pdf]

Table S8 Mean changes of ECG parameters from baseline, time averaged and placebo corrected, for each ETC-206 dose level and administration conditions.

| Parameters* | ETC-206 10 mg FASTED<br>(N=16)<br>[Standard Deviation] | ETC-206 20 mg FASTED<br>(N=14)<br>[Standard Deviation] | ETC-206 10 mg FED<br>(N=9)<br>[Standard Deviation] |
|-------------|--------------------------------------------------------|--------------------------------------------------------|----------------------------------------------------|
| HR (bpm)    | -2.0 [3.2]                                             | 0.1 [3.5]                                              | 2.4 [4.3]                                          |
| PR (ms)     | 4.3 [5.1]                                              | -3.6 [4.9]                                             | -1.5 [5.5]                                         |
| QRS (ms)    | 3.7 [3.3]                                              | -1.0 [1.6]                                             | -1.2 [3.3]                                         |
| QT (ms)     | 9.5 [9.1]                                              | -7.1 [8.1]                                             | -3.5 [10.9]                                        |
| QTcF (ms)   | 4.3 [4.0]                                              | -5.5 [5.8]                                             | 1.8 [5.6]                                          |

Legend - \*: All parameters are reported as “placebo corrected mean changes from baseline). Abbreviations - HR: Heart rate; bpm: beats per minute; ms: milliseconds, QTcF: Fridericia correction.

The panel shows that, HR changes ranged from -2.0 to 2.4 bpm respectively for the 10 mg fasted and 10 mg fed dosing conditions of ETC-206. PR changes ranged from -3.6 to 4.3 ms respectively for the 20 mg fasted and 10 mg fasted dosing conditions of ETC-206. QRS changes ranged from -1.2 to 3.7 ms respectively, for the 10 mg fed and 10 mg fasted dosing conditions of ETC-206. None of the changes was clinically relevant. For HR, PR and QRS none of the subjects met criteria for outlier ^ (outlier brief definitions provided below), and the time point analysis also did not show any clinically significant effects of ETC-206 (not shown). QTcF changes ranged from -5.5 to 4.3 ms respectively for the 20 mg fasted and 10 mg fasted dosing conditions of ETC-206 and, as for other parameters, they were not clinically relevant. Moreover, no clinically significant effect of ETC-206 on cardiac repolarization were shown with time point data analysis, neither outliers were found with the analysis of categorical cut points of the ECG (i.e. new U waves, new > 500 ms absolute QTc duration, and > 60 ms changes in QTc from baseline, 30-60 ms changes from baseline of QTcF) (not shown).

Outliers – **HR**: <50 bpm and at least 25% decrease from baseline (i.e. bradycardic event) or >100 bpm and at least a 25% increase from baseline (i.e. tachycardic event). **PR**: >200 ms and it was at least a 25% increase from baseline. **QRS**: >100 ms and it was at least a 25% increase from baseline.
